# Supplementary material for: Lewis acid-catalyzed oxidation of benzylamines to benzamides
Source: Royal Society of Chemistry journal article supplement (doi:10.1039/c2cc37149a), 2012-01-01

## Supporting Information

**General comments:** All reactions were carried out under air.  $\text{ZnBr}_2$ , pyridine, *tert*-butyl hydroperoxide (70% in water) and all the substrates were purchased from Aldrich and used as received. Gas chromatography analysis was performed on an Agilent HP-5890 instrument with a FID detector and HP-5 capillary column (polydimethylsiloxane with 5% phenyl groups, 30 m, 0.32 mm i.d., 0.25  $\mu\text{m}$  film thickness) using argon as carrier gas. Gas chromatography-mass analysis was carried out on an Agilent HP-5890 instrument with an Agilent HP-5973 Mass Selective Detector (EI) and HP-5 capillary column (polydimethylsiloxane with 5% phenyl groups, 30 m, 0.25 mm i.d., 0.25  $\mu\text{m}$  film thickness) using helium carrier gas.

**General procedure for the oxidation of *N*-methyl benzylamine *N*-methyl benzamide:** In a 50 mL reaction tube,  $\text{ZnBr}_2$  (10 mol%) and a stirring bar was added. And followed by the addition of *N*-methylbenzyl amine (1 mmol) and pyridine (0.1 mL) by syringe, at the end *tert*-butyl hydroperoxide (3 mmol; 70% aqueous) was added in one pot to the solution and keep the final solution at 80°C for 16 hours. Then cool it down to room temperature, the reaction tube was washed three times with ethyl acetate (3 ml). The combined organic solutions were evaporated with adsorption on silica gel and the crude product was purified by column chromatography using n-heptane/AcOEt (4:1-1:1) as the eluent.

### *N*-Methylbenzamide

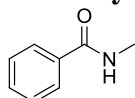

$^1\text{H NMR}$  (300 MHz,  $\text{CDCl}_3$ ):  $\delta$  7.65-7.72 (m, 2H), 7.30-7.44 (m, 3H), 6.27 (br s, 1H), 2.93 (d, 3H,  $J = 4.5$  Hz).

$^{13}\text{C NMR}$  (75 MHz,  $\text{CDCl}_3$ ):  $\delta$  168.3, 134.6, 131.4, 128.6, 126.9, 26.9.

### *N*,3-dimethylbenzamide

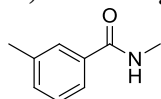

$^1\text{H NMR}$  (300 MHz,  $\text{CDCl}_3$ ):  $\delta$  7.44-7.52 (m, 2H), 7.18-7.22 (m, 2H), 6.44 (bs, 1H), 2.90 (d, 3H,  $J = 4.9$  Hz), 2.29 (s, 3H).

$^{13}\text{C NMR}$  (75 MHz,  $\text{CDCl}_3$ ):  $\delta$  168.6, 138.4, 134.6, 132.1, 128.4, 127.7, 123.9, 26.8, 21.4.

### 4-Bromo-*N*-methylbenzamide

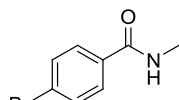

$^1\text{H NMR}$  (300 MHz,  $\text{CDCl}_3$ ):  $\delta$  7.44-7.64 (m, 4H), 6.24 (bs, 1H), 2.92 (d, 3H,  $J = 4.8$  Hz).

$^{13}\text{C NMR}$  (75 MHz,  $\text{CDCl}_3$ ):  $\delta$  167.3, 133.4, 131.8, 128.5, 126.1, 26.9.

### Benzamide

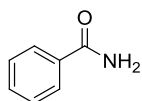

$^1\text{H NMR}$  (300 MHz,  $\text{CDCl}_3$ ):  $\delta$  7.73-7.80 (m, 2H), 7.34-7.51 (m, 3H), 6.04 (bs, 2H).

$^{13}\text{C NMR}$  (75 MHz,  $\text{CDCl}_3$ ):  $\delta$  169.9, 133.3, 132.1, 128.7, 127.4.

### 4-*tert*-Butylbenzamide

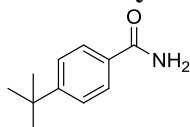

$^1\text{H NMR}$  (300 MHz,  $\text{CDCl}_3$ ):  $\delta$  7.68 (d, 2H,  $J = 8.6$  Hz), 7.37 (d, 2H,  $J = 8.8$  Hz), 6.21 (bs, 2H), 1.26 (s, 9H).

$^{13}\text{C NMR}$  (75 MHz,  $\text{CDCl}_3$ ):  $\delta$  169.8, 155.6, 130.5, 127.3, 125.6, 35.0, 31.2.

### 4-Methylbenzamide

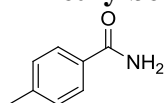

$^1\text{H NMR}$  (300 MHz,  $\text{CDCl}_3$ ):  $\delta$  7.64 (d, 2H,  $J = 8.3$  Hz), 7.17 (d, 2H,  $J = 7.9$  Hz), 6.09 (bs, 2H), 2.33 (s, 3H).

$^{13}\text{C NMR}$  (75 MHz,  $\text{CDCl}_3$ ):  $\delta$  169.6, 142.6, 130.5, 129.3, 127.4, 21.5.

### 3-Methoxybenzamide

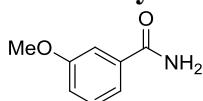

$^1\text{H NMR}$  (300 MHz,  $\text{CDCl}_3$ ):  $\delta$  7.23-7.36 (m, 3H), 6.93-7.05 (m, 1H), 6.05 (bs, 2H), 3.78 (s, 3H).

$^{13}\text{C NMR}$  (75 MHz,  $\text{CDCl}_3$ ):  $\delta$  169.4, 159.9, 134.8, 129.7, 119.2, 118.3, 112.6, 55.5.

### 1-Naphthamide

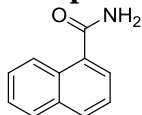

$^1\text{H NMR}$  (300 MHz,  $\text{DMSO-d}_6$ ):  $\delta$  8.31-8.41 (m, 1H), 7.97-8.11 (m, 3H), 7.55-7.72 (m, 5H).

$^{13}\text{C NMR}$  (75 MHz,  $\text{DMSO-d}_6$ ):  $\delta$  170.5, 134.6, 133.1, 129.72, 129.66, 128.1, 126.6, 126.1, 125.5, 125.1, 124.9.

### 4-Fluorobenzamide

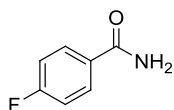

$^1\text{H NMR}$  (300 MHz,  $\text{CDCl}_3$ ):  $\delta$  7.76 (dd, 2H,  $J^1 = 8.9$  Hz,  $J^2 = 5.3$  Hz), 7.06 (t, 2H,  $J = 7.1$  Hz), 5.99 (bs, 2H).

### 4-Chlorobenzamide

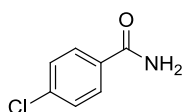

$^1\text{H NMR}$  (300 MHz,  $\text{CDCl}_3$ ):  $\delta$  7.69 (d, 2H,  $J = 8.7$  Hz), 7.36 (d, 2H,  $J = 8.5$  Hz), 6.04 (bs, 2H).

### Isonicotinamide

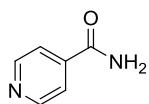

**<sup>1</sup>H NMR (400 MHz, DMSO<sup>d6</sup>):** δ 8.72 (d, 2H, *J* = 5.9 Hz), 8.26 (s, 1H), 7.78 (d, 2H, *J* = 6.1 Hz), 7.73 (s, 1H).

**<sup>13</sup>C NMR (100 MHz, DMSO<sup>d6</sup>):** δ 166.2, 150.1, 141.3, 121.4.

### Picolinamide

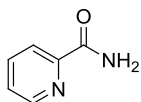

**<sup>1</sup>H NMR (400 MHz, DMSO<sup>d6</sup>):** δ 8.63 (d, 1H, *J* = 4.8 Hz), 8.12 (s, 1H), 8.05 (d, 1H, *J* = 7.9 Hz), 7.98 (dt, 1H, *J*<sup>1</sup> = 15.4 Hz, *J*<sup>2</sup> = 7.6 Hz, *J*<sup>3</sup> = 1.7 Hz), 7.65 (s, 1H), 7.55-7.61 (m, 1H).

**<sup>13</sup>C NMR (100 MHz, DMSO<sup>d6</sup>):** δ 166.0, 150.3, 148.4, 137.6, 126.4, 121.9.

### Nicotinamide

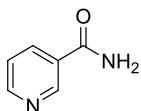

**<sup>1</sup>H NMR (400 MHz, DMSO<sup>d6</sup>):** δ 9.04 (d, 1H, *J* = 2.5 Hz), 8.70 (dd, 1H, *J*<sup>1</sup> = 4.9 Hz, *J*<sup>2</sup> = 1.7 Hz), 8.21 (td, 1H, *J*<sup>1</sup> = 7.9 Hz, *J*<sup>2</sup> = 1.9 Hz), 8.17 (s, 1H), 7.61 (s, 1H), 7.47-7.52 (m, 1H).

**<sup>13</sup>C NMR (100 MHz, DMSO<sup>d6</sup>):** δ 166.4, 151.9, 148.6, 135.1, 129.6, 123.4.

### Phenyl(2,2,6,6-tetramethylpiperidin-1-yl)methanone

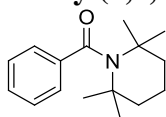

**<sup>1</sup>H NMR (400 MHz, DMSO<sup>d6</sup>):** δ 8.01 (d, 2H, *J* = 8.0 Hz), 7.45-7.55 (m, 1H), 7.32-7.43 (m, 2H), 1.35-1.75 (m, 6H), 1.21 (s, 6H), 1.05 (s, 6H).

**<sup>13</sup>C NMR (100 MHz, DMSO<sup>d6</sup>):** δ 166.4, 132.9, 129.8, 129.6, 128.5, 60.5, 39.1, 32.0, 20.9, 17.1.

GC-MS: 246 (50), 105 (100), 77 (10).

Xiao-Feng/ XWCB-76  
Au1H CDC13 /opt/topspin 1208 31

8.02  
7.99  
7.91  
7.51  
7.48  
7.42  
7.39  
7.37  
7.18

2.10  
1.71  
1.68  
1.64  
1.60  
1.54  
1.53  
1.51  
1.50  
1.41  
1.40  
1.37  
1.21  
1.05

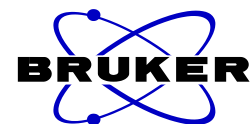

Current Data Parameters  
NAME xwcb76  
EXPNO 10  
PROCNO 1

F2 - Acquisition Parameters  
Date\_ 20120815  
Time 7.58  
INSTRUM AV300  
PROBHD 5 mm PABBO BB-  
PULPROG zg30  
TD 32768  
SOLVENT CDC13  
NS 32  
DS 4  
SWH 6172.839 Hz  
FIDRES 0.188380 Hz  
AQ 2.6542580 sec  
RG 181  
DW 81.000 usec  
DE 6.00 usec  
TE 295.0 K  
D1 1.0000000 sec  
TD0 1

==== CHANNEL f1 =====  
NUC1 1H  
P1 11.00 usec  
PL1 0.00 dB  
SFO1 300.1318534 MHz

F2 - Processing parameters  
SI 32768  
SF 300.1300381 MHz  
WDW EM  
SSB 0  
LB 0.10 Hz  
GB 0  
PC 1.00

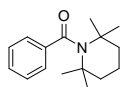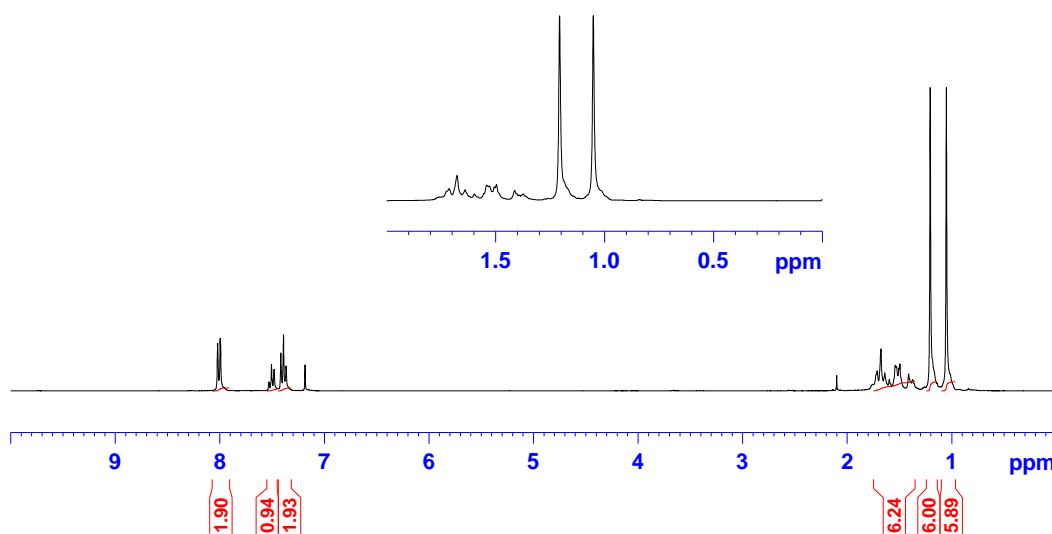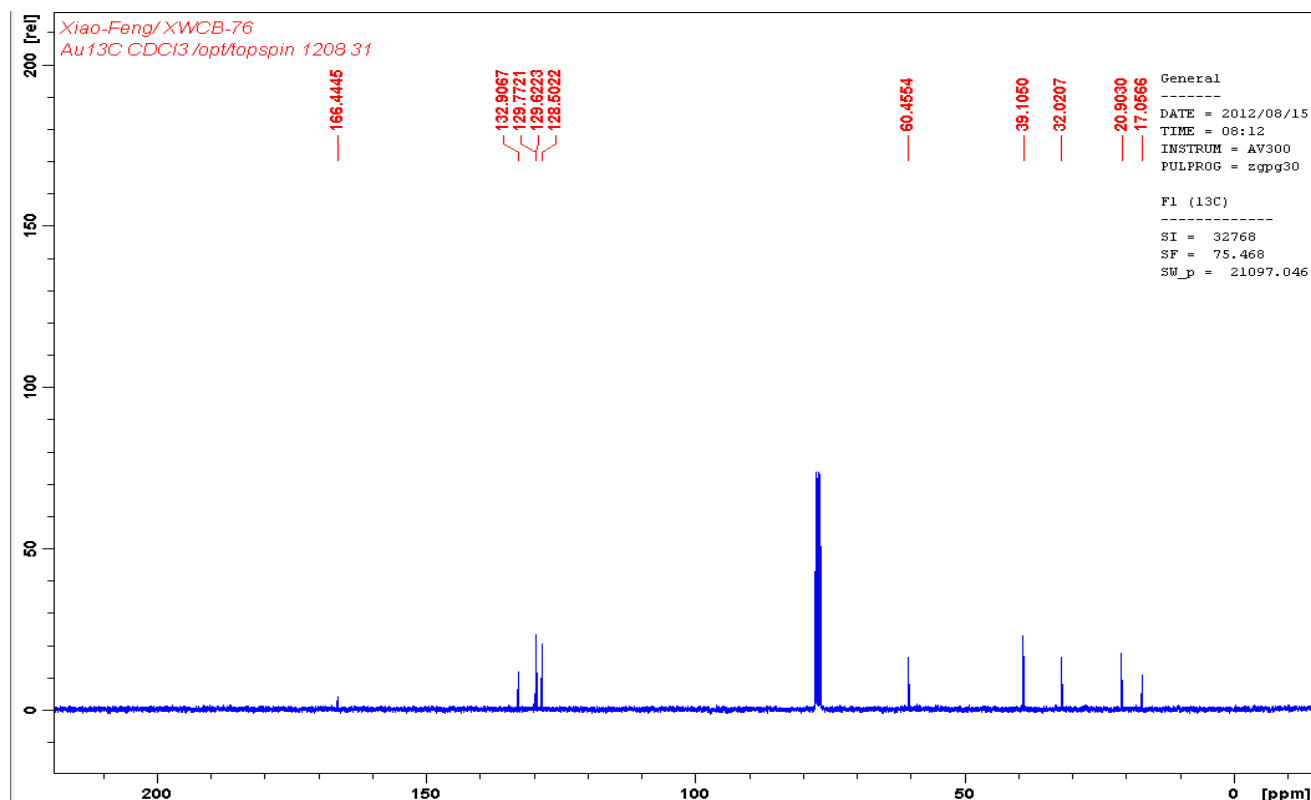

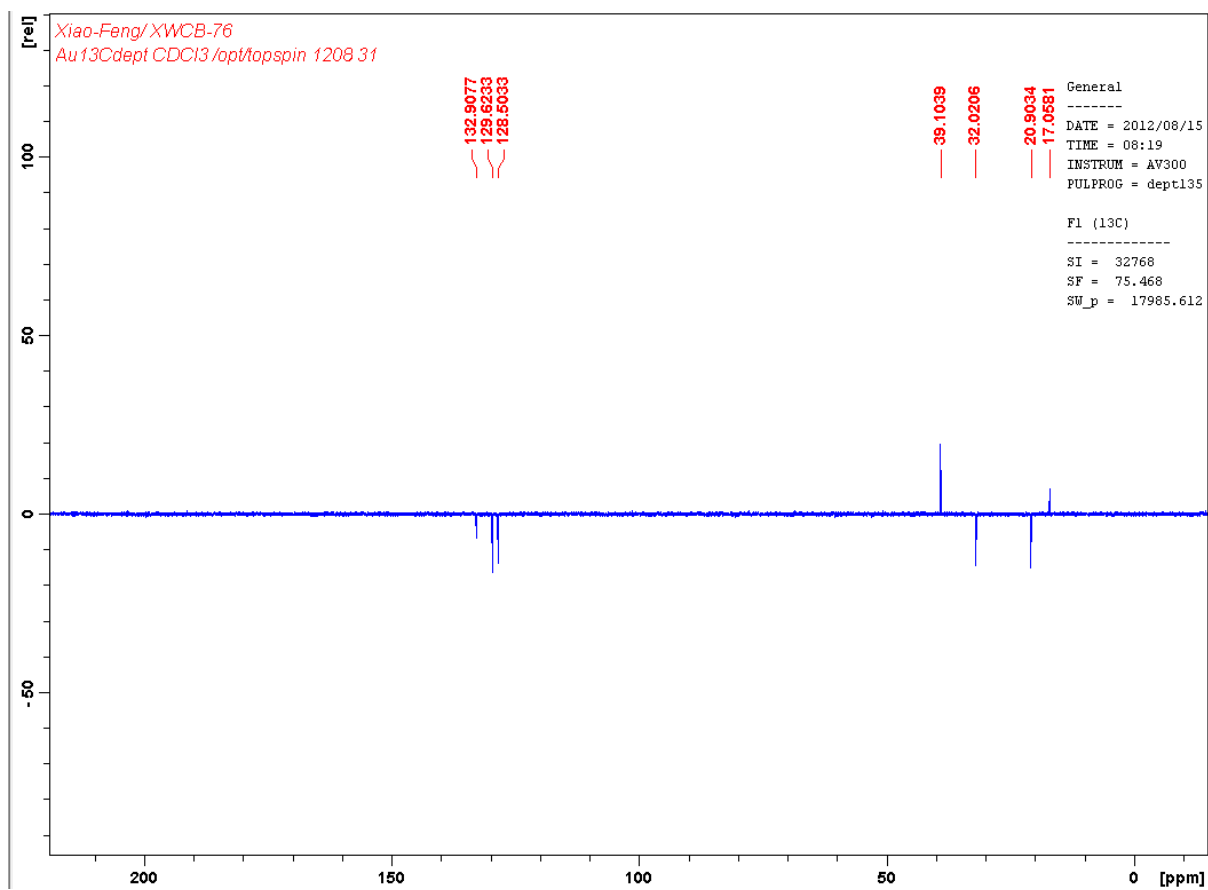

Supplement: c2cc37149a.pdf [file c2cc37149a.pdf]
